# Supplementary material for: Usefulness of Docking and Molecular Dynamics in Selecting Tumor Neoantigens to Design Personalized Cancer Vaccines: A Proof of Concept
Source: MDPI journal article supplement (doi:10.3390/vaccines11071174), 2023-06-29
Supplement: s1 [file s1]

## SUPPLEMENTARY MATERIAL:

**Table S1:** Number of total interactions and hydrophobic interactions of wild-type peptides with the corresponding HLA molecule.

| Gene Associated | Sequence   | # total Interactions | # Hydrophobic Interactions |
|-----------------|------------|----------------------|----------------------------|
| AKAP6           | WLIDMESLV  | 31                   | 21                         |
| BCSIL           | ALALARKGV  | 29                   | 19                         |
| DC1             | VMKFKNPPV  | 29                   | 19                         |
| GCN1L1          | ALLETLSLLL | 24                   | 15                         |
| GOLGA3          | SLDPTTSPV  | 23                   | 13                         |
| HELLS           | VTNSGKFLI  | 23                   | 12                         |
| MRM1            | LLFGMPPCL  | 23                   | 14                         |
| PGM5            | QQFAVGSYV  | 23                   | 11                         |
| ASTN1           | KPYGLDWAEL | 22                   | 15                         |
| SLC38A1         | ILAALFLGL  | 22                   | 13                         |
| SMARCD3         | KLFEFLVYGV | 22                   | 10                         |
| USP28           | LIIPFIHLI  | 22                   | 13                         |
| GNL3L           | NLNRCSPVP  | 21                   | 11                         |
| LAMA1           | STAFDFLAV  | 21                   | 10                         |
| MLL2            | ALSPVIPHI  | 20                   | 10                         |
| PGM5            | AVGSYVYSV  | 20                   | 9                          |
| SIVA1           | ALCGQCVRI  | 20                   | 10                         |
| SNX24           | KLSHQLVLL  | 20                   | 11                         |
| BCSIL           | ALARKGVQL  | 19                   | 10                         |
| CDK4            | ARDPHSGHFV | 19                   | 14                         |
| KIF3B           | FALGNVISA  | 15                   | 4                          |

**Table S2:** Interactions between P1 and P2 in the ASTN1 wild type

| # | P1   | P2   | Contact Score |
|---|------|------|---------------|
|   | Atom | Atom |               |
| 1 | C    | N    | 1             |

|                                  |    |    |              |
|----------------------------------|----|----|--------------|
| 2                                | O  | N  | 1            |
| 3                                | CA | N  | 1            |
| 4                                | C  | CA | 1            |
| 5                                | O  | CA | 0,997        |
| 6                                | C  | C  | 0,979        |
| 7                                | C  | O  | 0,95         |
| 8                                | O  | C  | 0,946        |
| 9                                | N  | N  | 0,943        |
| 10                               | CB | N  | 0,846        |
| 11                               | O  | O  | 0,807        |
| 12                               | C  | CB | 0,78         |
| 13                               | CA | CA | 0,698        |
| 14                               | CG | N  | 0,34         |
| 15                               | O  | CB | 0,257        |
| 16                               | C  | CG | 0,251        |
| 17                               | CA | O  | 0,228        |
| 18                               | CA | C  | 0,099        |
| 19                               | CB | O  | 0,08         |
| 20                               | O  | CG | 0,056        |
| 21                               | N  | CA | 0,034        |
| 22                               | CB | CA | 0,024        |
| 23                               | CA | CB | 0,012        |
| <b>Accumulated contact score</b> |    |    | <b>13,33</b> |

**Table S3:** Interactions between P1 and P2 in the ASTN1 neoantigen

| #  | P1   | P2   | Contact Score |
|----|------|------|---------------|
|    | Atom | Atom |               |
| 1  | C    | N    | 1             |
| 2  | O    | N    | 1             |
| 3  | C    | CA   | 0,999         |
| 4  | C    | CD   | 0,999         |
| 5  | CA   | N    | 0,999         |
| 6  | O    | CA   | 0,997         |
| 7  | CA   | CD   | 0,992         |
| 8  | C    | C    | 0,99          |
| 9  | O    | C    | 0,985         |
| 10 | C    | O    | 0,962         |
| 11 | O    | O    | 0,925         |
| 12 | O    | CD   | 0,895         |
| 13 | N    | N    | 0,887         |
| 14 | CB   | N    | 0,87          |
| 15 | C    | CG   | 0,852         |
| 16 | C    | CB   | 0,841         |
| 17 | CA   | CA   | 0,678         |
| 18 | N    | CD   | 0,581         |
| 19 | CG   | O    | 0,496         |
| 20 | CA   | O    | 0,416         |

|                                  |    |    |              |
|----------------------------------|----|----|--------------|
| 21                               | CB | CD | 0,403        |
| 22                               | CG | N  | 0,393        |
| 23                               | CB | O  | 0,275        |
| 24                               | O  | CB | 0,242        |
| 25                               | CA | C  | 0,18         |
| 26                               | CA | CG | 0,101        |
| 27                               | O  | CG | 0,081        |
| 28                               | CB | CA | 0,041        |
| 29                               | CB | C  | 0,031        |
| 30                               | CA | CB | 0,019        |
| 31                               | N  | CA | 0,014        |
| <b>Accumulated contact score</b> |    |    | <b>19,14</b> |

**Table S4:** Interactions between P2 and P3 in the ASTN1 neoantigen

| #  | P2   | P3   | Contact Score |
|----|------|------|---------------|
|    | Atom | Atom |               |
| 1  | C    | N    | 1             |
| 2  | O    | N    | 1             |
| 3  | CA   | N    | 1             |
| 4  | C    | CA   | 0,999         |
| 5  | O    | CA   | 0,997         |
| 6  | C    | C    | 0,983         |
| 7  | CB   | N    | 0,982         |
| 8  | O    | C    | 0,975         |
| 9  | C    | O    | 0,895         |
| 10 | N    | N    | 0,834         |
| 11 | O    | O    | 0,812         |

|                                  |    |    |              |
|----------------------------------|----|----|--------------|
| 12                               | C  | CB | 0,771        |
| 13                               | CA | CA | 0,685        |
| 14                               | O  | CB | 0,219        |
| 15                               | CB | O  | 0,144        |
| 16                               | CG | N  | 0,124        |
| 17                               | CB | CA | 0,1          |
| 18                               | CA | O  | 0,073        |
| 19                               | CA | C  | 0,072        |
| 20                               | CB | C  | 0,026        |
| 21                               | CA | CB | 0,013        |
| 22                               | N  | CA | 0,011        |
| <b>Accumulated contact score</b> |    |    | <b>11,72</b> |

**Table S5:** Interactions between P2 and P3 in the ASTN1 wild type

| #  | P2   | P3   | Contact Score |
|----|------|------|---------------|
|    | Atom | Atom |               |
| 1  | C    | N    | 1             |
| 2  | O    | N    | 1             |
| 3  | C    | CA   | 0,999         |
| 4  | CA   | N    | 0,999         |
| 5  | O    | CA   | 0,997         |
| 6  | C    | C    | 0,977         |
| 7  | O    | C    | 0,953         |
| 8  | CB   | N    | 0,95          |
| 9  | N    | N    | 0,836         |
| 10 | C    | CB   | 0,826         |
| 11 | O    | O    | 0,716         |

|                                  |    |    |              |
|----------------------------------|----|----|--------------|
| 12                               | C  | O  | 0,712        |
| 13                               | CA | CA | 0,677        |
| 14                               | O  | CB | 0,464        |
| 15                               | C  | CG | 0,333        |
| 16                               | CA | C  | 0,059        |
| 17                               | CG | N  | 0,055        |
| 18                               | CB | CA | 0,046        |
| 19                               | CD | N  | 0,029        |
| 20                               | CA | CB | 0,027        |
| 21                               | N  | CA | 0,012        |
| <b>Accumulated contact score</b> |    |    | <b>12,67</b> |
